# Supplementary material
Source: MDPI journal article supplement (https://www.mdpi.com/search?q=materials-12-01258)
Supplement: s001 [file materials-12-01258-s001.pdf]

# Supplementary Materials: Effect of A-Site Nonstoichiometry on Defect Chemistry and Electrical Conductivity of Undoped and Y-Doped SrZrO<sub>3</sub>

Liliya Dunyushkina \*, Adelya Khaliullina, Anastasia Meshcherskikh, Alexander Pankratov and Denis Osinkin

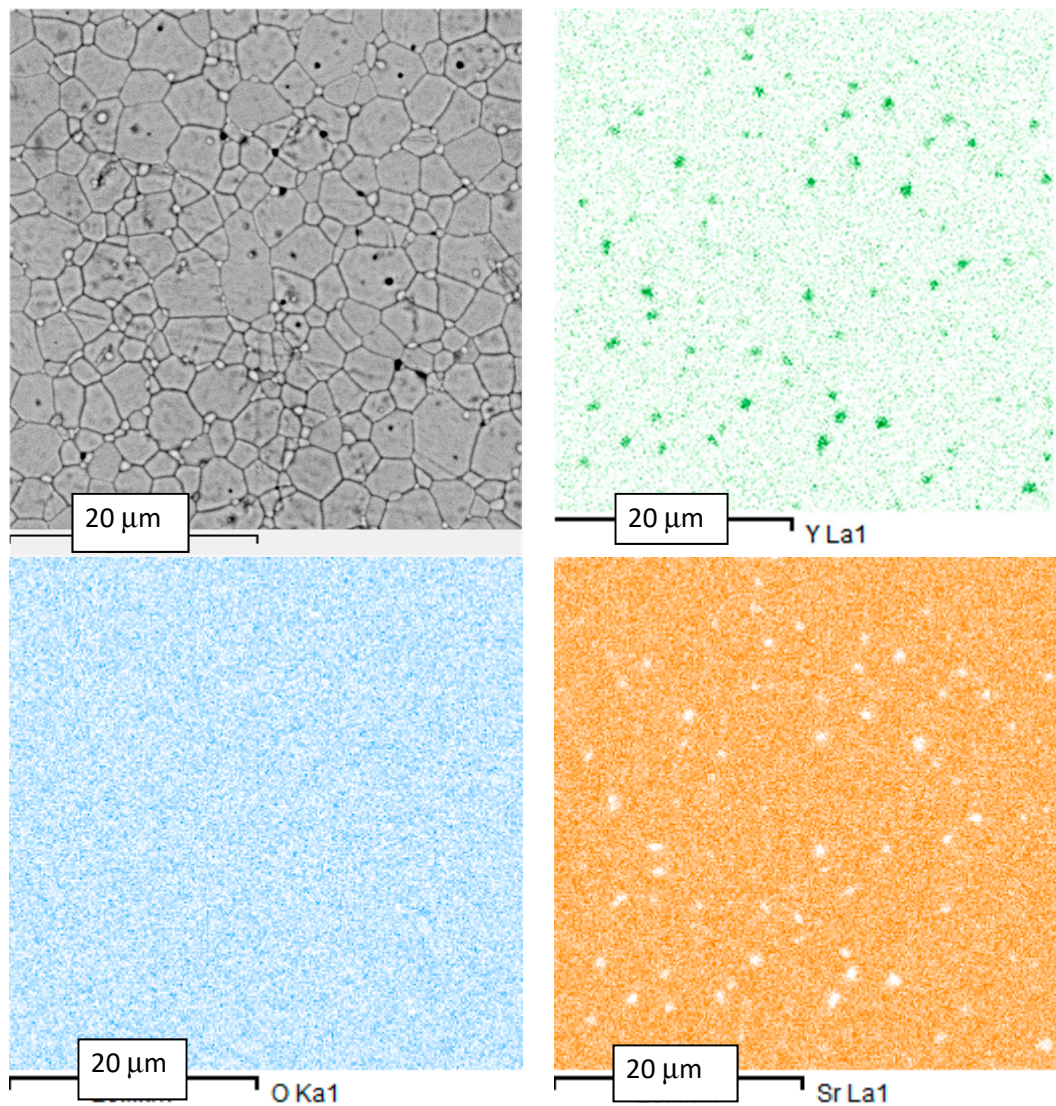



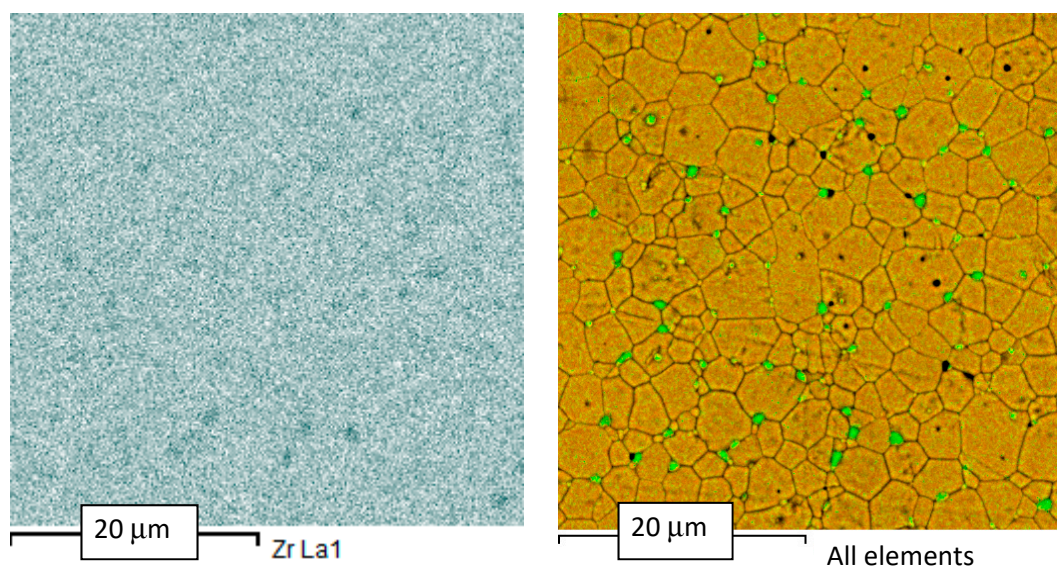

**Figure S1.** SEM image and EDX mapping of the elements on the surface of SZY0.94 after polishing and thermal etching at 1400 °C.

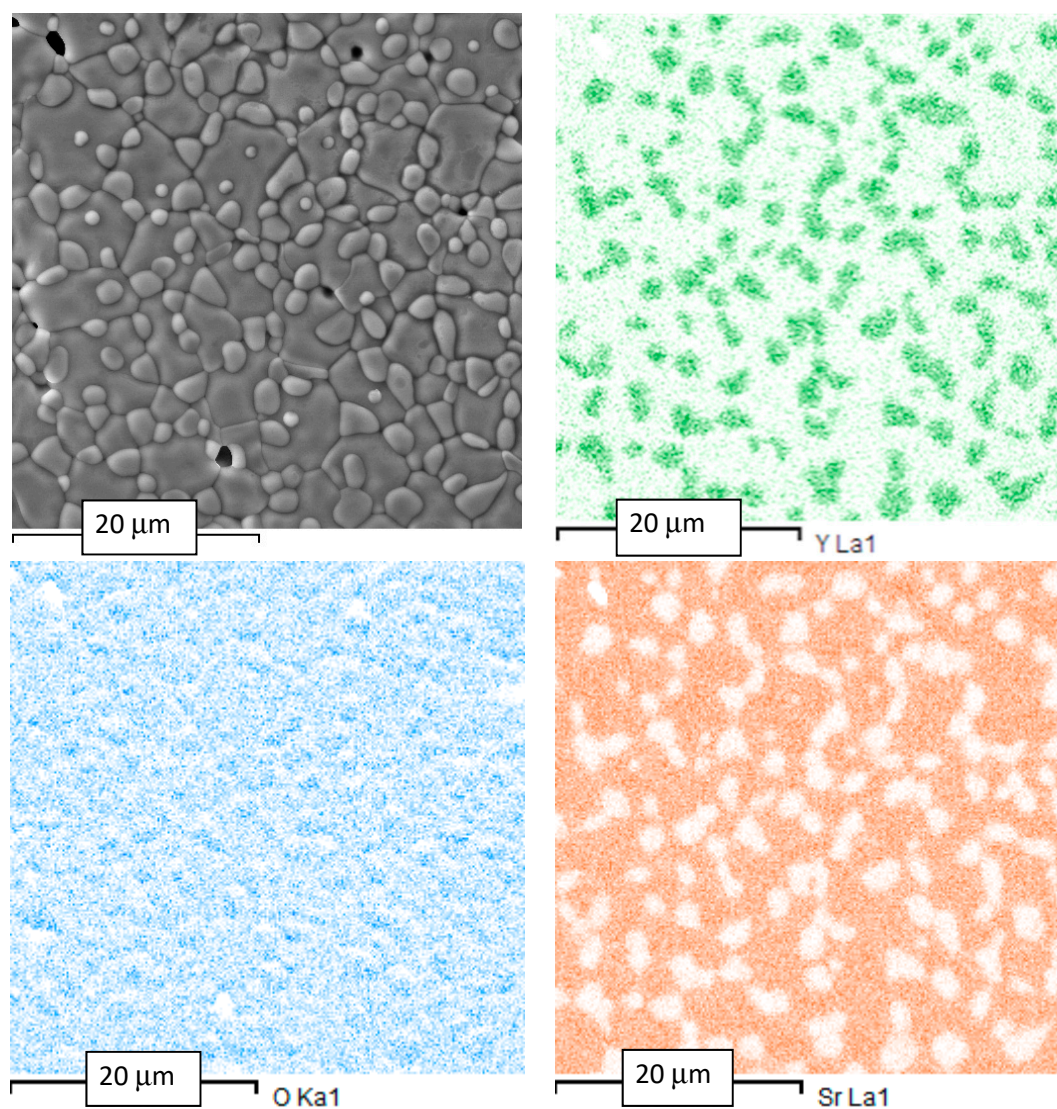



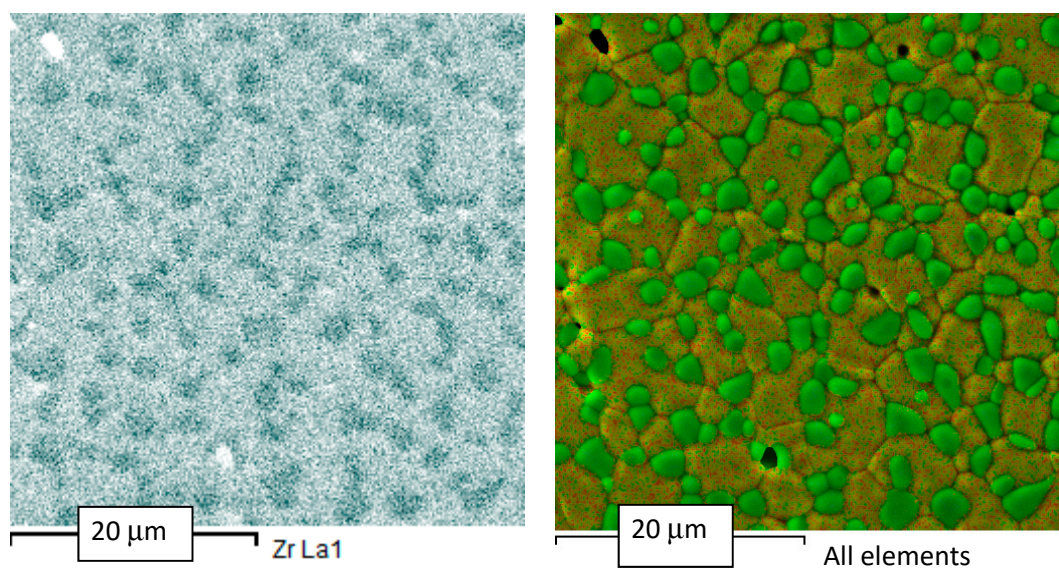

**Figure S2.** SEM image and EDX mapping of the elements on the surface of SZY0.94 after polishing and thermal etching at 1650 °C.

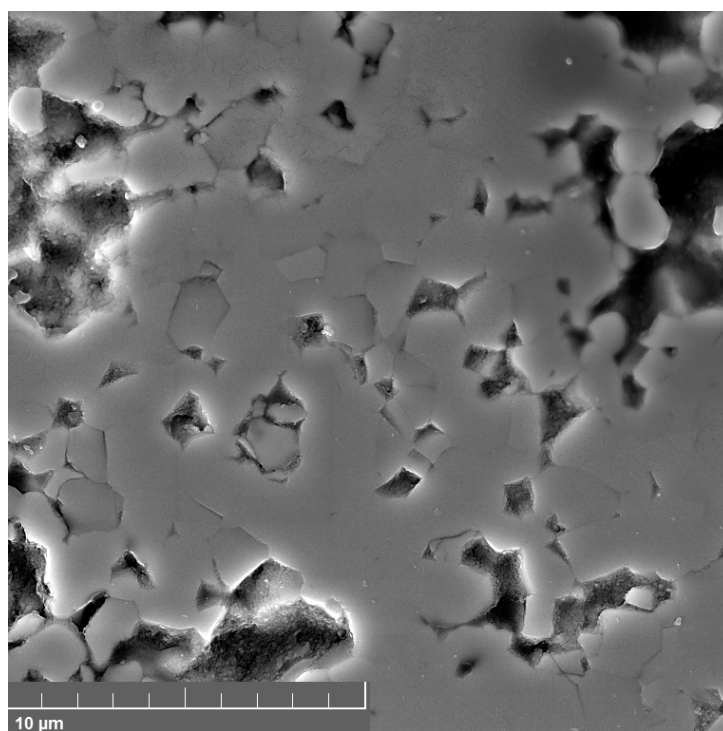

**Figure S3.** SEM image of as-polished cross-section of SZY1.00.
